# Supplementary material for: Clinical Significance of Whole-Body Computed Tomography Scans in Pediatric Out-of-Hospital Cardiac Arrest Patients Without Prehospital Return of Spontaneous Circulation
Source: Preprints.org preprint supplement (doi:10.20944/preprints202409.0557.v1), 2024-09-06
Supplement: Supplementary file 1 [file supplementary]

| Table S1　Clinical information and CT findings of 19 pediatric OHCA patients with non-ROSC | | | | | | | | | | | | | | | | | | | | |
| --- | --- | --- | --- | --- | --- | --- | --- | --- | --- | --- | --- | --- | --- | --- | --- | --- | --- | --- | --- | --- |
| Case no. | 1 | 2 | 3 | 4 | 5 | 6 | 7 | 8 | 9 | 10 | 11 | 12 | 13 | 14 | 15 | 16 | 17 | 18 | 19 | Detection rate (n) |
| Age/sex | 2y/m | 2y11m/f | 2m/f | 5m/m | 9y/f | 5y11m/f | 1y2m/m | 10 m /f | 2y7m/f | 3m/f | 5m/f | 1y2m/m | 2m/m | 1m/m | 1y4m/m | 6y1m/m | 4m/f | 1m/m | 9m/m |  |
| Past history | none | | | | asthma (currently untreated) | tubulinopathy | none | | congenital cytomegalovirus infection, symptomatic epilepsy | none | neonatal asphyxia, transient tachypnea of the newborn | none | | | febrile convulsions, asthma | none | | | periventricular leukomalacia |  |
| Scene of the find | sleeping on prone position at home | | | sleeping on right lateral position beside the bed | supine position with loss of conscious at home | sleeping on prone position at home | prone position with the face wrapped in a blanket at home | sleeping on prone position at home | | | | | | | sleeping on supine position at home | loss of consciousness on the train | sleeping on supine position at home | | |  |
| Estimated time from the last sighting to discovery | 10m | 7h30m | 5h30m | 4h | 2m | 5h40m | 4h | 7h30m | 2h50m | 1h20m | 6h30m | 3h | 9h20m | 4h25m | 1h | 0m | 2h25m | 8h | 7h30m |  |
| Bystander CPR | + | - | - | - | + | + | - | - | - | + | + | - | + | + | - | - | - | - | - |  |
| ROSC at emergency department | - | - | - | - | - | - | - | - | - | - | - | - | - | - | - | - | - | - | - |  |
| Timing of CT scanning | during CPR | | | | | | | after CPR | during CPR | after CPR | during CPR | | | | | | | | | |
| CT findings |  |  |  |  |  |  |  |  |  |  |  |  |  |  |  |  |  |  |  |  |
| Head |  |  |  |  |  |  |  |  |  |  |  |  |  |  |  |  |  |  |  |  |
| Brain swelling | + | + | - | - | - | + | + | + | + | + | + | + | + | + | + | + | + | + | + | 84 |
| Loss of cerebral gray-white matter differentiation | - | + | + | + | - | + | - | - | + | + | + | + | + | - | + | + | + | + | + | 74 |
| Hyperdense intracranial venous sinus | - | + | - | + | - | - | - | - | - | - | + | - | - | - | + | - | - | + | + | 32 |
| Lung |  |  |  |  |  |  |  |  |  |  |  |  |  |  |  |  |  |  |  |  |
| Symmetrical consolidation/ground-glass opacity | + | + | + | + | + | + | - | + | + | + | + | + | + | + | + | + | + | + | + | 95 |
| Asymmetrical consolidation/ground glass opacity | - | - | - | - | - | + | + | - | - | - | - | - | - | - | - | - | - | - | - | 11 |
| Mediastinum |  |  |  |  |  |  |  |  |  |  |  |  |  |  |  |  |  |  |  |  |
| Cardiomegaly | - | + | + | + | + | - | - | + | + | + | + | + | + | + | + | + | + | + | + | 84 |
| Pericardial effusion | - | - | - | - | - | - | - | - | - | - | - | - | - | - | - | - | - | - | - | 0 |
| Hyperdense aortic wall | + | - | + | - | + | + | + | + | + | - | + | + | + | + | + | + | + | + | + | 84 |
| Narrowed aorta | + | + | + | + | + | + | + | + | + | + | + | + | + | + | + | + | + | + | + | 100 |
| Gas in the cardiac cavity, aorta, or superior vena cava | + | + | + | - | - | + | - | + | + | + | + | + | + | + | + | - | + | + | + | 79 |
| Abdomen and pelvis |  |  |  |  |  |  |  |  |  |  |  |  |  |  |  |  |  |  |  |  |
| Hepatomegaly | + | - | + | + | + | + | + | + | + | + | + | + | - | + | + | + | - | - | + | 79 |
| Dilated inferior vena cava | - | - | - | - | + | - | - | - | - | - | - | + | - | - | - | - | + | - | - | 16 |
| Dilated gastrointestinal tract | - | + | + | + | + | - | + | + | + | + | + | + | + | + | + | + | + | + | + | 89 |
| Gas in the liver, kidney, pancreas, or spleen | - | + | + | - | - | - | - | - | - | + | + | + | - | + | - | - | - | + | + | 42 |
| Soft tissue |  |  |  |  |  |  |  |  |  |  |  |  |  |  |  |  |  |  |  |  |
| Dorsal subcutaneous fatty edema | - | - | - | - | - | - | - | - | - | - | - | - | - | - | - | - | - | - | - | 0 |

y - year

m - month

h - hour

CPR - Cardiopulmonary Resuscitation

CT - Computed Tomography

ROSC - Return of Spontaneous Circulation

| Table S2　Clinical information and CT findings of 8 pediatric OHCA patients with ROSC | | | | | | | | | |
| --- | --- | --- | --- | --- | --- | --- | --- | --- | --- |
| Case no. | 1 | 2 | 3 | 4 | 5 | 6 | 7 | 8 | Detection rate (n) |
| Age/sex | 12m/m | 10m/m | 10m/m | 12d/f | 3y5m/f | 4m/m | 17y/f | 13y10m/f |  |
| Past history | none | | | | | | | hypertrophic cardiomyopathy |  |
| Scene of the find | sleeping on prone position at home | choked while eating | | sleeping on prone position at home | on the car to the hospital | choked while eating | fallen down while playing volleyball | lying down at school |  |
| Estimated time from the last sighting to discovery | 5m | 0 | 0 | 1m | 0 | 1h55m | 0 | 10m |  |
| Bystander CPR | + | - | - | - | + | - | - | + |  |
| ROSC at emergency department | + | + | + | + | + | + | + | + |  |
|  |  |  |  |  |  |  |  |  |  |
| Timing of CT scanning | during CPR | | | | | | | |  |
| CT findings |  |  |  |  |  |  |  |  |  |
| Head |  |  |  |  |  |  |  |  |  |
| Brain swelling | - | - | + | - | - | - | - | - | 12.5 |
| Loss of cerebral gray-white matter differentiation | + | - | + | - | - | + | - | - | 37.5 |
| Hyperdense intracranial venous sinus | - | - | - | - | - | - | - | - | 0 |
| Lung |  |  |  |  |  |  |  |  |  |
| Symmetrical consolidation/ground glass opacity | + | - | - | - | + | - | + | + | 50 |
| Asymmetrical consolidation/ground-glass opacity | + | + | - | - | - | - | - | - | 25 |
| Mediastinum |  |  |  |  |  |  |  |  |  |
| Cardiomegaly | - | - | - | - | - | - | + | + | 25 |
| Pericardial effusion | - | - | - | - | - | - | - | - | 0 |
| Hyperdense aortic wall | - | - | - | - | - | - | - | - | 0 |
| Narrowed aorta | - | - | - | - | - | - | - | - | 0 |
| Gas in the cardiac cavity, aorta, or superior vena cava | - | - | - | - | - | - | - | - | 0 |
| Abdomen and pelvis |  |  |  |  |  |  |  |  |  |
| Hepatomegaly | - | + | - | - | - | - | - | - | 12.5 |
| Dilated inferior vena cava | - | - | - | + | - | - | - | + | 25 |
| Dilated gastrointestinal tract | + | - | + | + | + | + | - | - | 62.5 |
| Gas in the liver, kidney, pancreas, or spleen | - | - | - | - | - | - | - | - | 0 |
| Soft tissue |  |  |  |  |  |  |  |  |  |
| Subcutaneous fatty edema | - | - | - | - | - | - | - | - | 0 |

y - year

m - month

h - hour

CPR - Cardiopulmonary Resuscitation

CT - Computed Tomography

ROSC - Return of Spontaneous Circulation
